# Supplementary material for: Epidemiology and Integrative Taxonomy of Helminths of Invasive Wild Boars, Brazil
Source: MDPI journal article supplement (doi:10.3390/pathogens12020175), 2023-01-23
Supplement: s1 [file s1]

**Table S6.** Morphometric data of *Trichuris suis* by different authors, presented as mean  $\pm$  standard deviation, in millimeters

|                                           | <b>This study<br/>(n=10)</b> | <b>Cutillas et al. [25]</b> |                  | <b>Nissen et al. [26]</b> |
|-------------------------------------------|------------------------------|-----------------------------|------------------|---------------------------|
| <b>Host</b>                               | Wild boar                    | Pig                         | Wild boar        | Pig                       |
| <b>Male</b>                               |                              |                             |                  |                           |
| Length                                    | 36.784 $\pm$ 3.854           | 40.4 $\pm$ 4.2              | 40.8 $\pm$ 8.8   | 28.9                      |
| Esophagus                                 | 2.346 $\pm$ 0.29             | 2.61 $\pm$ 0.31             | 2.5 $\pm$ 0.58   | -                         |
| Width of the anterior end                 | 0.184 $\pm$ 0.07             | 0.20 $\pm$ 0.02             | 0.20 $\pm$ 0.03  | 0.16                      |
| Width at the esophagus-intestine junction | 0.379 $\pm$ 0.08             | 0.35 $\pm$ 0.04             | 0.38 $\pm$ 0.06  | -                         |
| Width of the posterior end                | 0.725 $\pm$ 0.098            | 0.87 $\pm$ 0.06             | 0.83 $\pm$ 0.13  | 0.58                      |
| Spicule                                   | 2.37 $\pm$ 0.182             | 2.35 $\pm$ 0.15             | 2.43 $\pm$ 0.22  | 2.21                      |
| Spicule sheath                            | 0.29 $\pm$ 0.132             | 0.34 $\pm$ 0.20             | 0.15 $\pm$ 0.09  | -                         |
| <b>Female</b>                             |                              |                             |                  |                           |
| Length                                    | 44.77 $\pm$ 3.8              | 44.3 $\pm$ 2.8              | 46.3 $\pm$ 5.3   | 28.5                      |
| Esophagus                                 | 3.268 $\pm$ 0.201            | 3.12 $\pm$ 0.16             | 3.28 $\pm$ 0.39  | -                         |
| Width of the anterior end                 | 0.21 $\pm$ 0.04              | 0.19 $\pm$ 0.01             | 0.20 $\pm$ 0.02  | 0.18                      |
| Width at the esophagus-intestine junction | 0.34 $\pm$ 0.08              | 0.36 $\pm$ 0.03             | 0.30 $\pm$ 0.08  | -                         |
| Width of the posterior end                | 0.73 $\pm$ 0.11              | 0.93 $\pm$ 0.10             | 0.90 $\pm$ 0.08  | 0.69                      |
| Vulva to the esophagus-intestine junction | 0.25 $\pm$ 0.05              | 0.23 $\pm$ 0.08             | 0.25 $\pm$ 0.022 | -                         |
