# Supplementary material for: Epidemiology and Integrative Taxonomy of Helminths of Invasive Wild Boars, Brazil
Source: MDPI journal article supplement (doi:10.3390/pathogens12020175), 2023-01-23
Supplement: s1 [file s1]

**Table S4:** Morphometric data of *Globocephalus urosubulatus* by different authors, presented as mean  $\pm$  standard deviation, in millimeters

|                            | This study<br>(n=10) | Francis [22]  | Nanev et al.<br>[23] | Pinheiro et al.<br>[24] |
|----------------------------|----------------------|---------------|----------------------|-------------------------|
| <b>Host</b>                | Wild boar            | Pig           | Wild boar            | Pig                     |
| <b>Male</b>                |                      |               |                      |                         |
| Length                     | 6.17 $\pm$ 0.471     | 3.16-5.32     | 3.5-5                | 4 – 5                   |
| Width                      | 0.35 $\pm$ 0.023     | 0.320 – 0.400 | 0.360 – 0.370        | 0.167 – 0.300           |
| Buccal capsule length      | 0.15 $\pm$ 0.014     | 0.119 – 0.127 | 0.140 – 0.200        | 0.125 – 0.150           |
| Buccal capsule width       | 0.13 $\pm$ 0.023     | 0.162 – 0.186 | 0.150 – 0.170        | 0.100 – 0.140           |
| Excretory pore             | 0.49 $\pm$ 0.04      | 0.320 – 0.500 | –                    | 0.317 – 0.417           |
| Nerve ring                 | 048 $\pm$ 0.039      | 0.290 – 0.460 | 0.380 – 0.520        | 0.317 – 0.367           |
| Cervical papillae          | 0.56 $\pm$ 0.042     | –             | 0.430 – 0.610        | 0.370 – 0.533           |
| Esophagus                  | 0.62 $\pm$ 0.026     | 0.550 – 0.710 | 0.560 – 0.690        | 0.487 – 0.540           |
| Espicules                  | 0.61 $\pm$ 0.09      | 0.490 – 0.550 | 0.420 – 0.580        | 0.337 – 0.527           |
| Gubernacle                 | 0.08 $\pm$ 0.001     | 0.089 – 0.110 | 0.070 – 0.080        | 0.060 – 0.088           |
| <b>Female</b>              |                      |               |                      |                         |
| Length                     | 8.4 $\pm$ 0.27       | 5.02-6.53     | 4.5-8                | 6-8                     |
| Width                      | 0.47 $\pm$ 0.054     | 0.490 – 0.570 | 0.420 – 0.500        | 0.429 – 0.514           |
| Buccal capsule length      | 0.21 $\pm$ 0.017     | 0.192 – 0.220 | 0.140 – 0.200        | 0.167 – 0.227           |
| Buccal capsule width       | 0.14 $\pm$ 0.02      | 0.159 – 0.178 | 0.150 – 0.170        | 0.140 – 0.160           |
| Excretory pore             | 0.65 $\pm$ 0.02      | 0.320 – 0.530 | –                    | 0. 433 – 0.547          |
| Nerve ring                 | 0.63 $\pm$ 0.035     | 0.380 – 0.460 | 0.380 – 0.520        | 0.387 – 0.500           |
| Cervical papillae          | 0.71 $\pm$ 0.017     | –             | 0.430 – 0.610        | 0.433 – 0.547           |
| Esophagus                  | 0.84 $\pm$ 0.11      | 0.680 – 0.75  | 0.560 – 0.690        | 0.593 – 0.687           |
| Vulva to the posterior end | 6.67 $\pm$ 0.023     | 1.73-2.91     | 2.20-2.40            | 3-5                     |
| Anus to the posterior end  | 0.22 $\pm$ 0.034     | –             | 0.120 – 0.180        | 0.130 – 0.200           |
