# Supplementary material for: Epidemiology and Integrative Taxonomy of Helminths of Invasive Wild Boars, Brazil
Source: MDPI journal article supplement (doi:10.3390/pathogens12020175), 2023-01-23
Supplement: s1 [file s1]

**Table S9.** Major genetic identities of 18S rDNA, 28S rDNA, and ITS regions sequences of helminths from the gastrointestinal and urinary tracts of wild boars hunted in the state of São Paulo, Brazil, with sequences deposited in the NCBI database.

| Species                                 | bp   | Host, Location                                                                 | Identity | E value | Query Cover | Accession number |
|-----------------------------------------|------|--------------------------------------------------------------------------------|----------|---------|-------------|------------------|
| <b>Nematoda</b>                         |      |                                                                                |          |         |             |                  |
| <b>18S rRNA</b>                         |      |                                                                                |          |         |             |                  |
| <i>Ascarops strongylina</i>             | 1773 | <i>Streptopharagus</i> sp.<br>( <i>Macaca mulata</i> , Guilin, China)          | 98,71%   | 0.0     | 100%        | HM067977         |
| <i>Strongyloides ransomi</i>            | 1539 | <i>S. ransomi</i><br>( <i>Sus scrofa</i> , Wakayama, Japão)                    | 99,94%   | 0.0     | 80%         | AB453327         |
| <i>Globocephalus urosubulatus</i>       | 1599 | <i>Ancylostoma caninum</i><br>( <i>Canis familiaris</i> , não informado)       | 99%      | 0.0     | 99%         | AJ920347         |
| <i>Oesophagostomum dentatum</i>         | 753  | <i>Oesophagostomum muntiacum</i><br>( <i>Muntiacus reevesi</i> , Tokyo, Japão) | 100%     | 0.0     | 100%        | LC415112         |
| <i>Trichuris suis</i>                   | 1728 | <i>T. suis</i><br>( <i>Sus scrofa domestica</i> , Espanha)                     | 100%     | 0.0     | 100%        | HF586905         |
| <i>Stephanurus dentatus</i>             | 1587 | <i>S. dentatus</i> (Não informado)                                             | 100%     | 0.0     | 100%        | MW979564         |
| <b>ITS region</b>                       |      |                                                                                |          |         |             |                  |
| <i>Globocephalus urosubulatus</i>       | 790  | <i>Ancylostoma caninum</i><br>( <i>Canis lupus familiaris</i> , EUA)           | 90,58%   | 0.0     | 100%        | JQ812694         |
| <i>Oesophagostomum dentatum</i>         | 726  | <i>O. dentatum</i><br>( <i>Sus scrofa</i> , Yangjiang, China)                  | 99,86%   | 0.0     | 94%         | AJ619979         |
| <i>Stephanurus dentatus</i>             | 580  | <i>Strongylus edentatus</i><br>( <i>Equus asinus</i> , Henan, China)           | 83,42%   | 6e-151  | 78%         | KP693438         |
| <b>28S rRNA</b>                         |      |                                                                                |          |         |             |                  |
| <i>Ascarops strongylina</i>             | 991  | <i>Cylicospirura petrowi</i><br>( <i>Felis silvestris</i> , Taunus, Alemanha)  | 89,29%   | 0.0     | 100%        | KM434335         |
| <i>Globocephalus urosubulatus</i>       | 605  | <i>Ancylostoma caninum</i><br>( <i>Canis familiaris</i> , não informado)       | 98,84%   | 0.0     | 100%        | AM039739         |
| <i>Oesophagostomum dentatum</i>         | 599  | <i>Oesophagostomum muntiacum</i><br>( <i>Muntiacus reevesi</i> , Tokyo, Japão) | 99,00%   | 0.0     | 99%         | LC415112         |
| <i>Stephanurus dentatus</i>             | 621  | <i>S. dentatus</i><br>( <i>Sus scrofa</i> , não informado)                     | 100%     | 0.0     | 100%        | MW979564         |
| <b>Acantocephala</b>                    |      |                                                                                |          |         |             |                  |
| <b>28S rRNA</b>                         |      |                                                                                |          |         |             |                  |
| <i>Macracanthorhynchus hirudinaceus</i> | 1032 | <i>M. hirudinaceus</i><br>( <i>Sus scrofa leucomystax</i> , Yamaguchi, Japão)  | 98,55%   | 0.0     | 100%        | LC350002         |
| <b>ITS region</b>                       |      |                                                                                |          |         |             |                  |
| <i>Macracanthorhynchus hirudinaceus</i> | 585  | <i>M. hirudinaceus</i><br>( <i>Sus scrofa leucomystax</i> , Yamaguchi, Japão)  | 94,41%   | 0.0     | 100%        | LC350000         |
