# Supplementary material for: Epidemiology and Integrative Taxonomy of Helminths of Invasive Wild Boars, Brazil
Source: MDPI journal article supplement (doi:10.3390/pathogens12020175), 2023-01-23
Supplement: s1 [file s1]

**Table S5:** Morphometric data of *Oesophagostomum dentatum* by different authors, presented as mean  $\pm$  standard deviation, in millimeters

|                            | This study<br>(n=10) | Dakova e<br>Panayotova-Pencheva<br>[19] |
|----------------------------|----------------------|-----------------------------------------|
| <b>Host</b>                | Wild boar            | Wild boar                               |
| <b>Male</b>                |                      |                                         |
| Length                     | 8.98 $\pm$ 0.038     | 9.46 $\pm$ 0.28                         |
| Width                      | 0.21 $\pm$ 0.018     | 0.218 $\pm$ 0.014                       |
| Excretory pore             | 0.34 $\pm$ 0.023     | –                                       |
| Nerve ring                 | 0.24 $\pm$ 0.008     | –                                       |
| Esophagus length           | 0.43 $\pm$ 0.017     | 0.397 $\pm$ 0.104                       |
| Esophagus width            | 0.13 $\pm$ 0.013     | 0.110 $\pm$ 0.007                       |
| Spicules                   | 0.98 $\pm$ 0.118     | 1.135 $\pm$ 0.030                       |
| Gubernacle                 | 0.10 $\pm$ 0.007     | 0.127 $\pm$ 0.006                       |
| <b>Female</b>              |                      |                                         |
| Length                     | 12.88 $\pm$ 0.409    | 11.5 $\pm$ 0.6                          |
| Width                      | 0.24 $\pm$ 0.008     | 0.233 $\pm$ 0.014                       |
| Excretory pore             | 0.345 $\pm$ 0.021    | –                                       |
| Nerve ring                 | 0.24 $\pm$ 0.023     | –                                       |
| Esophagus length           | 0.45 $\pm$ 0.02      | 0.426 $\pm$ 0.102                       |
| Esophagus width            | 0.12 $\pm$ 0.008     | 0.115 $\pm$ 0.005                       |
| Vulva to the posterior end | 0.63 $\pm$ 0.113     | –                                       |
| Vulva to the anus          | 0.29 $\pm$ 0.021     | 0.347 $\pm$ 0.015                       |
| Anus to the posterior end  | 0.27 $\pm$ 0.043     | 0.293 $\pm$ 0.007                       |
