# Supplementary material for: Epidemiology and Integrative Taxonomy of Helminths of Invasive Wild Boars, Brazil
Source: MDPI journal article supplement (doi:10.3390/pathogens12020175), 2023-01-23
Supplement: s1 [file s1]

**Table S1.** Descriptors of helminth infection in wild boars (*Sus scrofa*) from São Paulo state, Brazil.

| Helminths                               | Site of infection                          | Prevalence (%) | Mean Abundance $\pm$ SD | Mean intensity $\pm$ SD | Range of Intensity |
|-----------------------------------------|--------------------------------------------|----------------|-------------------------|-------------------------|--------------------|
| <b>NEMATODA</b>                         |                                            |                |                         |                         |                    |
| <b>Ancylostomatoidea</b>                |                                            |                |                         |                         |                    |
| <i>Globocephalus urosubulatus</i>       | Small intestine                            | 94.3           | 215.5 $\pm$ 31.7        | 228.6 $\pm$ 32.2        | 1 - 892            |
| <b>Strongyloidea</b>                    |                                            |                |                         |                         |                    |
| <i>Stephanurus dentatus</i>             | Peritoneum, ureters, kidneys, liver, heart | 71.4           | 17.9 $\pm$ 3.8          | 25.1 $\pm$ 4.6          | 1 - 341            |
| <i>Oesophagostomum dentatum</i>         | Large intestine                            | 2.9            | 0.03                    | 1                       | -                  |
| <b>Metastrongyloidea</b>                |                                            |                |                         |                         |                    |
| <i>Metastrongylus salmi</i>             | Lungs                                      | 82.9           | 25.9 $\pm$ 5.8          | 31.2 $\pm$ 6.6          | 1 - 128            |
| <i>Metastrongylus pudendotectus</i>     | Lungs                                      | 11.4           | 0.26 $\pm$ 0.1          | 2.25 $\pm$ 0.6          | 1 - 4              |
| <b>Rhabditoidea</b>                     |                                            |                |                         |                         |                    |
| <i>Strongyloides ransomi</i>            | Small intestine                            | 59.3           | 118.3 $\pm$ 32.6        | 188.2 $\pm$ 46          | 1 - 673            |
| <b>Spiruroidea</b>                      |                                            |                |                         |                         |                    |
| <i>Ascarops strongylina</i>             | Stomach                                    | 28.6           | 0.57 $\pm$ 0.2          | 2 $\pm$ 0.6             | 1 - 6              |
| <b>Trichuroidea</b>                     |                                            |                |                         |                         |                    |
| <i>Trichuris suis</i>                   | Large intestine                            | 8.6            | 0.23 $\pm$ 0.1          | 2.7 $\pm$ 0.7           | 1 - 8              |
| <b>Ascaridoidea</b>                     |                                            |                |                         |                         |                    |
| <i>Ascaris suum</i>                     | Small intestine                            | 2.9            | 0.03                    | 1                       | -                  |
| <b>ACANTOCEPHALA</b>                    |                                            |                |                         |                         |                    |
| <b>Oligacanthorrhynchidae</b>           |                                            |                |                         |                         |                    |
| <i>Macracanthorhynchus hirudinaceus</i> | Small intestine                            | 5.7            | 0.2 $\pm$ 0.2           | 3.5 $\pm$ 2.5           | 1 – 6              |

SD: standard deviation
