# Supplementary material for: Epidemiology and Integrative Taxonomy of Helminths of Invasive Wild Boars, Brazil
Source: MDPI journal article supplement (doi:10.3390/pathogens12020175), 2023-01-23
Supplement: s1 [file s1]

**Table S2:** Morphometric data of *Ascarops strongylina* by different authors, presented as mean  $\pm$  standard deviation, in millimeters

|                             | <b>This study<br/>(n=10)</b> | <b>Dakova and Panayotova-Pencheva [19]</b> |
|-----------------------------|------------------------------|--------------------------------------------|
| <b>Host</b>                 | Wild boar                    | Pig                                        |
| <b>Male</b>                 |                              |                                            |
| Length                      | 13.4 $\pm$ 0.73              | 12                                         |
|                             | 0.336 $\pm$                  |                                            |
| Width                       | 0.005                        | 0.33                                       |
| Pharynx                     | 0.10 $\pm$ 0.01              | 0.086                                      |
| Esophagus                   | 3.65 $\pm$ 0.12              | 3.2                                        |
|                             | 0.295 $\pm$                  |                                            |
| Excretory pore              | 0.023                        | -                                          |
|                             | 0.256 $\pm$                  |                                            |
| Nerve ring                  | 0.012                        | -                                          |
|                             | 0.515 $\pm$                  |                                            |
| Smaller spicule             | 0.117                        | 0.575                                      |
|                             | 2.940 $\pm$                  |                                            |
| Bigger spicule              | 0.151                        | 2.1                                        |
| Cloaca to the posterior end | 0.25 $\pm$ 0.037             | 0.253                                      |
| Gubernacle length           | 0.071 $\pm$ 0.08             | 0.055                                      |
| Gubernacle width            | 0.054 $\pm$ 0.01             | 0.038                                      |
| Caudal ala width            | 0.33 $\pm$ 0.093             | 0.29                                       |
| <b>Female</b>               |                              |                                            |
|                             | 17.945 $\pm$                 |                                            |
| Length                      | 1.09                         | 16.52 $\pm$ 2.76                           |
|                             | 0.375 $\pm$                  |                                            |
| Width                       | 0.033                        | 0.357.8 $\pm$ 0.037                        |
| Pharynx                     | 0.11 $\pm$ 0.008             | 0.083 $\pm$ 0.008                          |
| Esophagus                   | 3.460 $\pm$ 0.48             | 3.36 $\pm$ 0.4                             |
|                             | 0.417 $\pm$                  |                                            |
| Excretory pore              | 0.011                        | -                                          |
| Nerve ring                  | 0.288 $\pm$ 0.03             | -                                          |
| Vulva to the anterior end   | 8.525 $\pm$ 0.6              | 8.120 $\pm$ 1.34                           |
|                             | 0.305 $\pm$                  |                                            |
| Anus to the posterior end   | 0.017                        | 0.232 $\pm$ 0.059                          |
