# Supplementary material for: Epidemiology and Integrative Taxonomy of Helminths of Invasive Wild Boars, Brazil
Source: MDPI journal article supplement (doi:10.3390/pathogens12020175), 2023-01-23
Supplement: s1 [file s1]

**Table S3:** Morphometric data of parthenogenetic females of *Strongyloides ransomi* by different authors, presented as mean  $\pm$  standard deviation, in millimeters

|                           | <b>This study (n=10)</b> | <b>Alicata [20]</b> | <b>Giang et al. [21]</b> |
|---------------------------|--------------------------|---------------------|--------------------------|
| <b>Host</b>               | Wild boar                | Pig                 | Pig                      |
| <b>Female</b>             |                          |                     |                          |
| Length                    | 5.26 $\pm$ 0.276         | 3.3 – 4.5           | 4.5 – 5.0                |
| Width                     | 0.09 $\pm$ 0.008         | 0.054 – 0.062       | 0.052 – 0.060            |
| Nerve ring                | 0.25 $\pm$ 0.015         | –                   | –                        |
| Esophagus                 | 1.015 $\pm$ 0.026        | 0.61 – 0.88         | 0.940 – 1.1              |
| Vulva to the anterior end | 3.26 $\pm$ 0.159         | 1.9 – 2.9           | 2.6 – 3.1                |
| Anus to the posterior end | 0.08 $\pm$ 0.005         | 0.053 – 0.083       | 0.055 – 0.075            |
