# Supplementary material for: Epidemiology and Integrative Taxonomy of Helminths of Invasive Wild Boars, Brazil
Source: MDPI journal article supplement (doi:10.3390/pathogens12020175), 2023-01-23
Supplement: s1 [file s1]

**Table S8.** Primers used in the PCR reactions

| Nematoda      |         |        |      |                                  |                           |
|---------------|---------|--------|------|----------------------------------|---------------------------|
| Região        | Nome    | T°C    | pb   | Sequência                        | Referência                |
| 18S1 rRNA     | 988-F   | 50°C   | 1500 | 5'- CTCAAAGATTAAGCCATGC-3'       | Holterman<br>et al., 2006 |
|               | 1912-R  |        |      | 5'- TTTACGGTCAGAACTAGGG-3'       |                           |
| 18S2 rRNA     | 1813-F  | 52°C   | 1500 | 5'-CTGCGTGAGAGGTGA AAT-3'        |                           |
|               | 2646-R  |        |      | 5'-GCTACCTTGTTACGACTTTT-3'       |                           |
| ITS region    | NC5-F   | 54,5°C | 800  | 5'-GTAGGTGAACCTGCGGAAGGATCATT-3' | Gasser<br>et al., 1993    |
|               | NC2-R   |        |      | 5'-TTAGTTTCTTTTCCTCCGCT-3'       |                           |
| 28S rRNA      | D2A-F   | 56°C   | 770  | 5'-ACAAGTACCGTGAGGGAAAGTTG-3'    | De Ley<br>et al., 1999    |
|               | D3B-R   |        |      | 5'-TCGGAAGGAACCAGCTACTA-3'       |                           |
|               |         |        |      |                                  |                           |
| Acantocephala |         |        |      |                                  |                           |
| ITS region    | LSU-5-F | 56°C   | 1400 | 5'-TAGGTCGACCCGCTGAAYTTAAGCA-3'  | Olson<br>et al., 2003     |
|               | 1500R-R |        |      | 5'-GCTATCCTGAGGGAACTTCG-3'       |                           |
| 28S rRNA      | BD1-F   | 49°C   | 850  | 5'-GTCGTAACAAGGTTTCCGTA-3'       | Luton<br>et al., 1992     |
|               | BD2-R   |        |      | 5' -TATGCTTAAATTCAGCGGGT-3'      |                           |
