# Supplementary material for: Epidemiology and Integrative Taxonomy of Helminths of Invasive Wild Boars, Brazil
Source: MDPI journal article supplement (doi:10.3390/pathogens12020175), 2023-01-23
Supplement: s1 [file s1]

**Table S7:** Morphometric data of *Macracanthorhynchus hirudinaceus* by different authors, presented as maximum and minimum values, in millimeters

|                         | <b>This study (n=3)</b> | <b>Lisitsyna [27]</b> | <b>Amin et al. [28]</b> |
|-------------------------|-------------------------|-----------------------|-------------------------|
| <b>Host</b>             | Wild boar               | Wild boar             | Wild boar               |
| <b>Female</b>           |                         |                       |                         |
| Length                  | 304 – 381               | 105 – 500             | 110 – 120               |
| Width                   | 6 - 9                   | 7 - 9                 | 5 – 6                   |
| Number of hook rows     | 6                       | 6                     | 5 - 6                   |
| Number of hooks per row | 6                       | 5 - 6                 | 5 - 6                   |
